# Supplementary material
Source: Springer Nature journal article supplement (https://www.springermedizin.de/resource/supplementary/12885_2001_10_MOESM6_ESM.pdf/9460004)

**LoVo****DLD-1****TRAP products****ITAS** →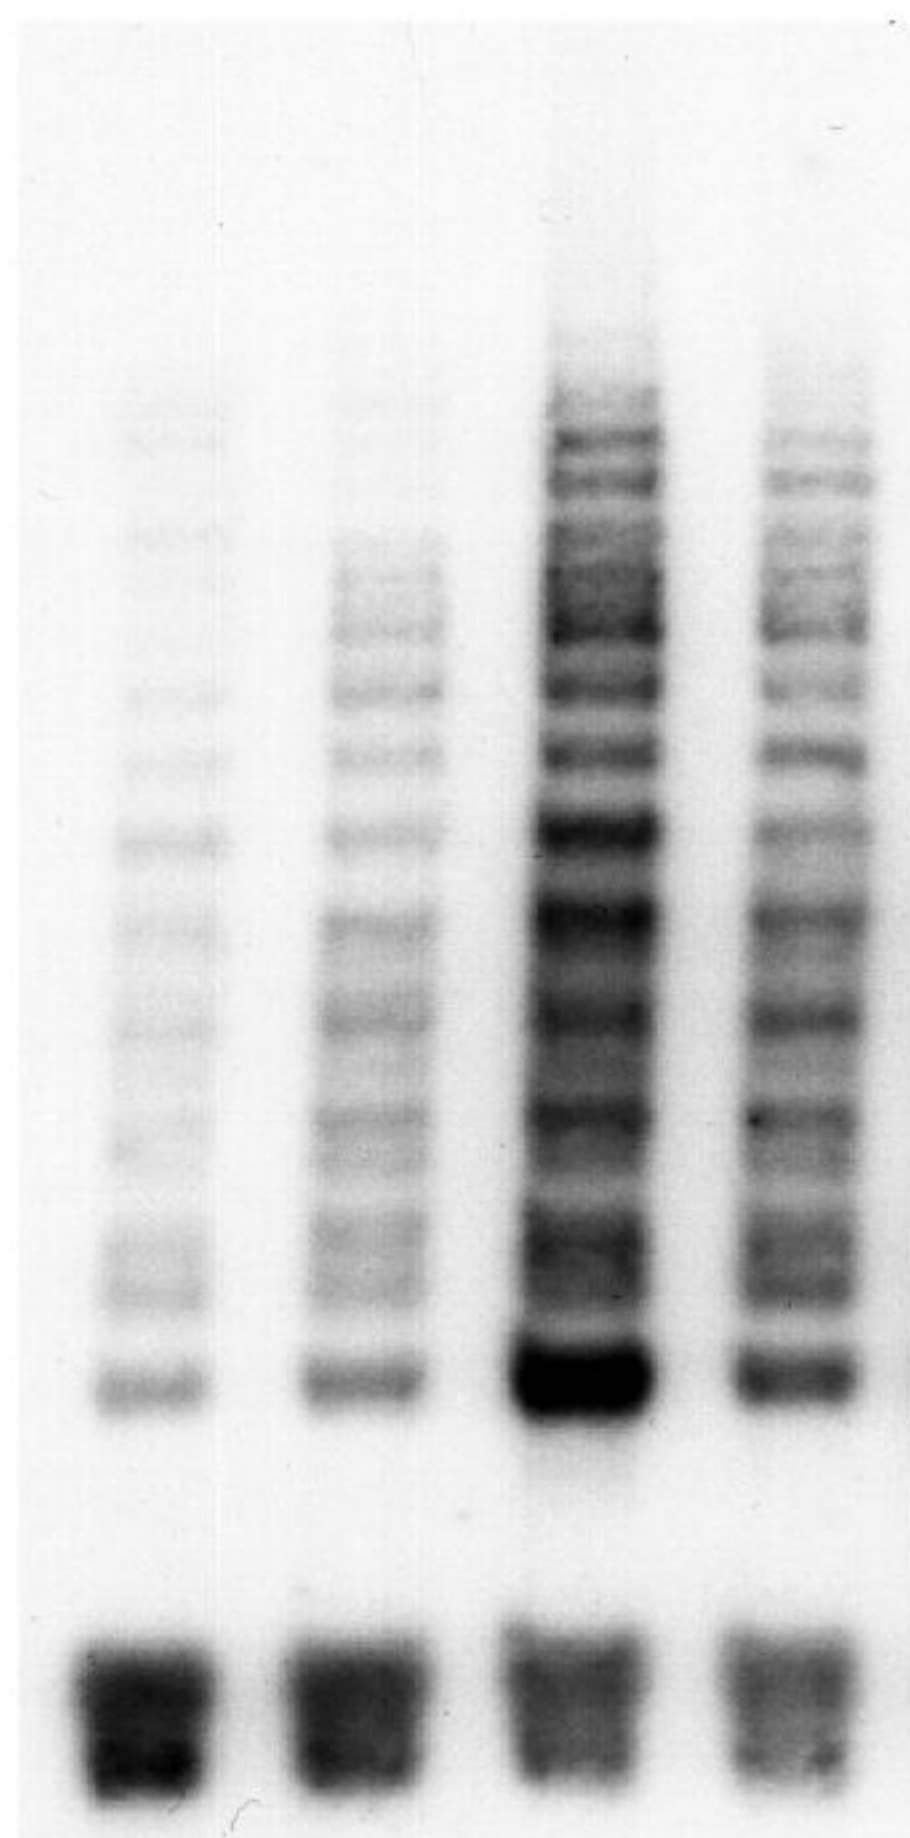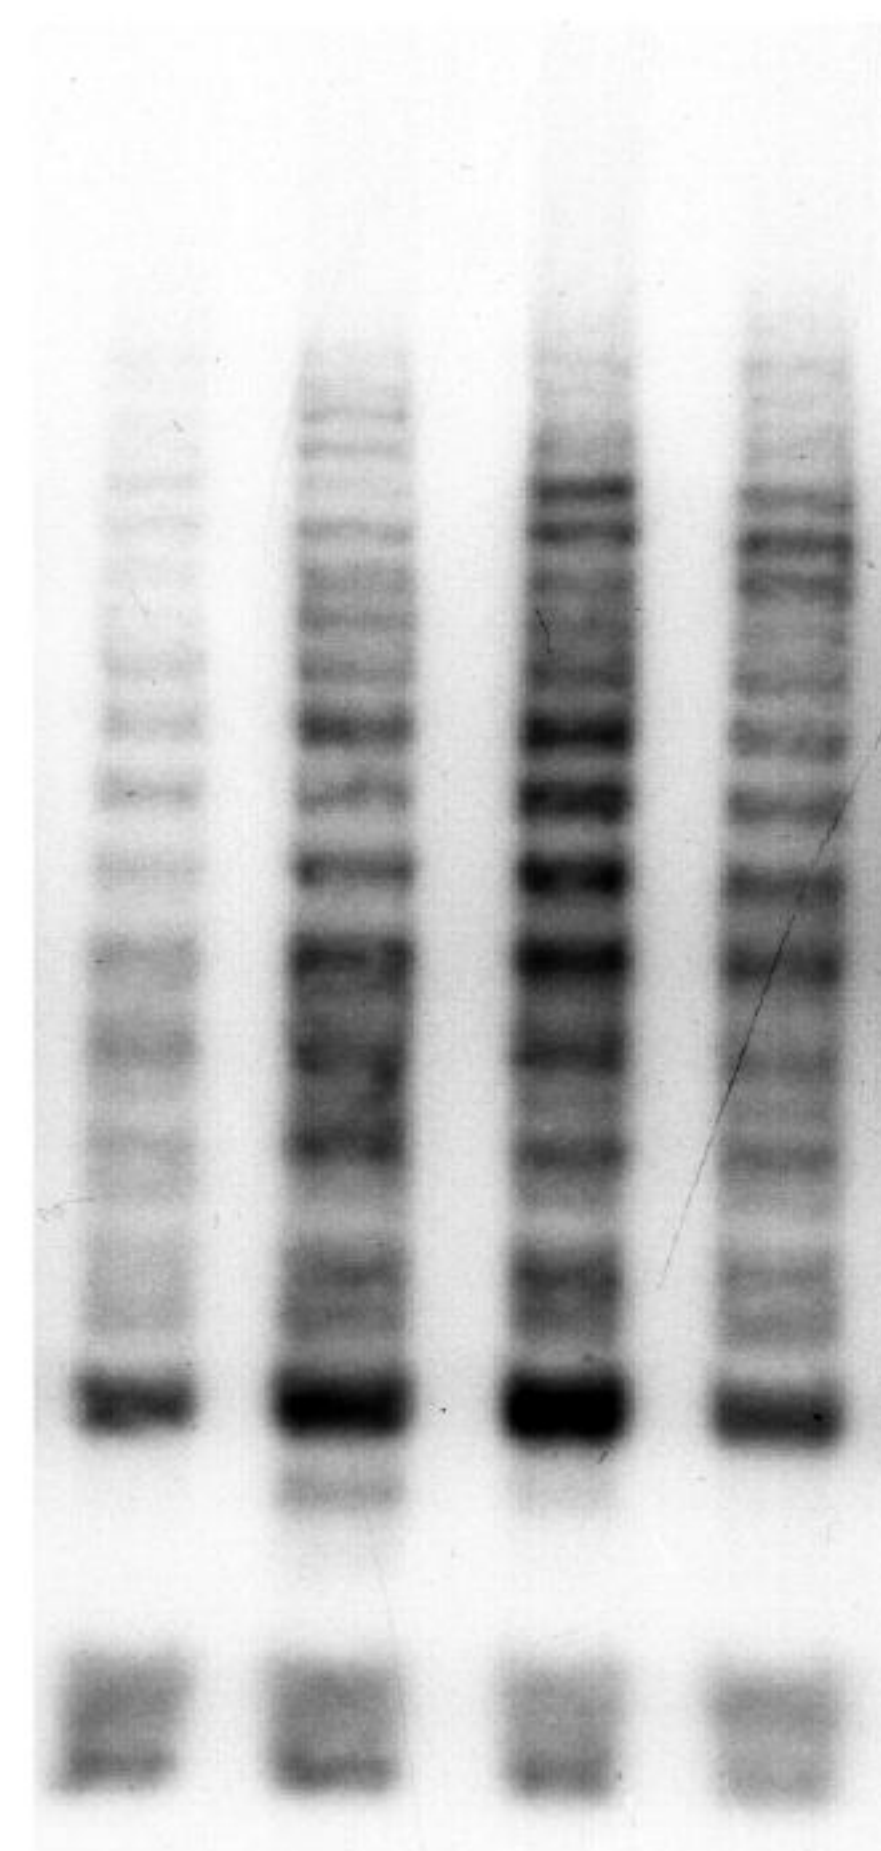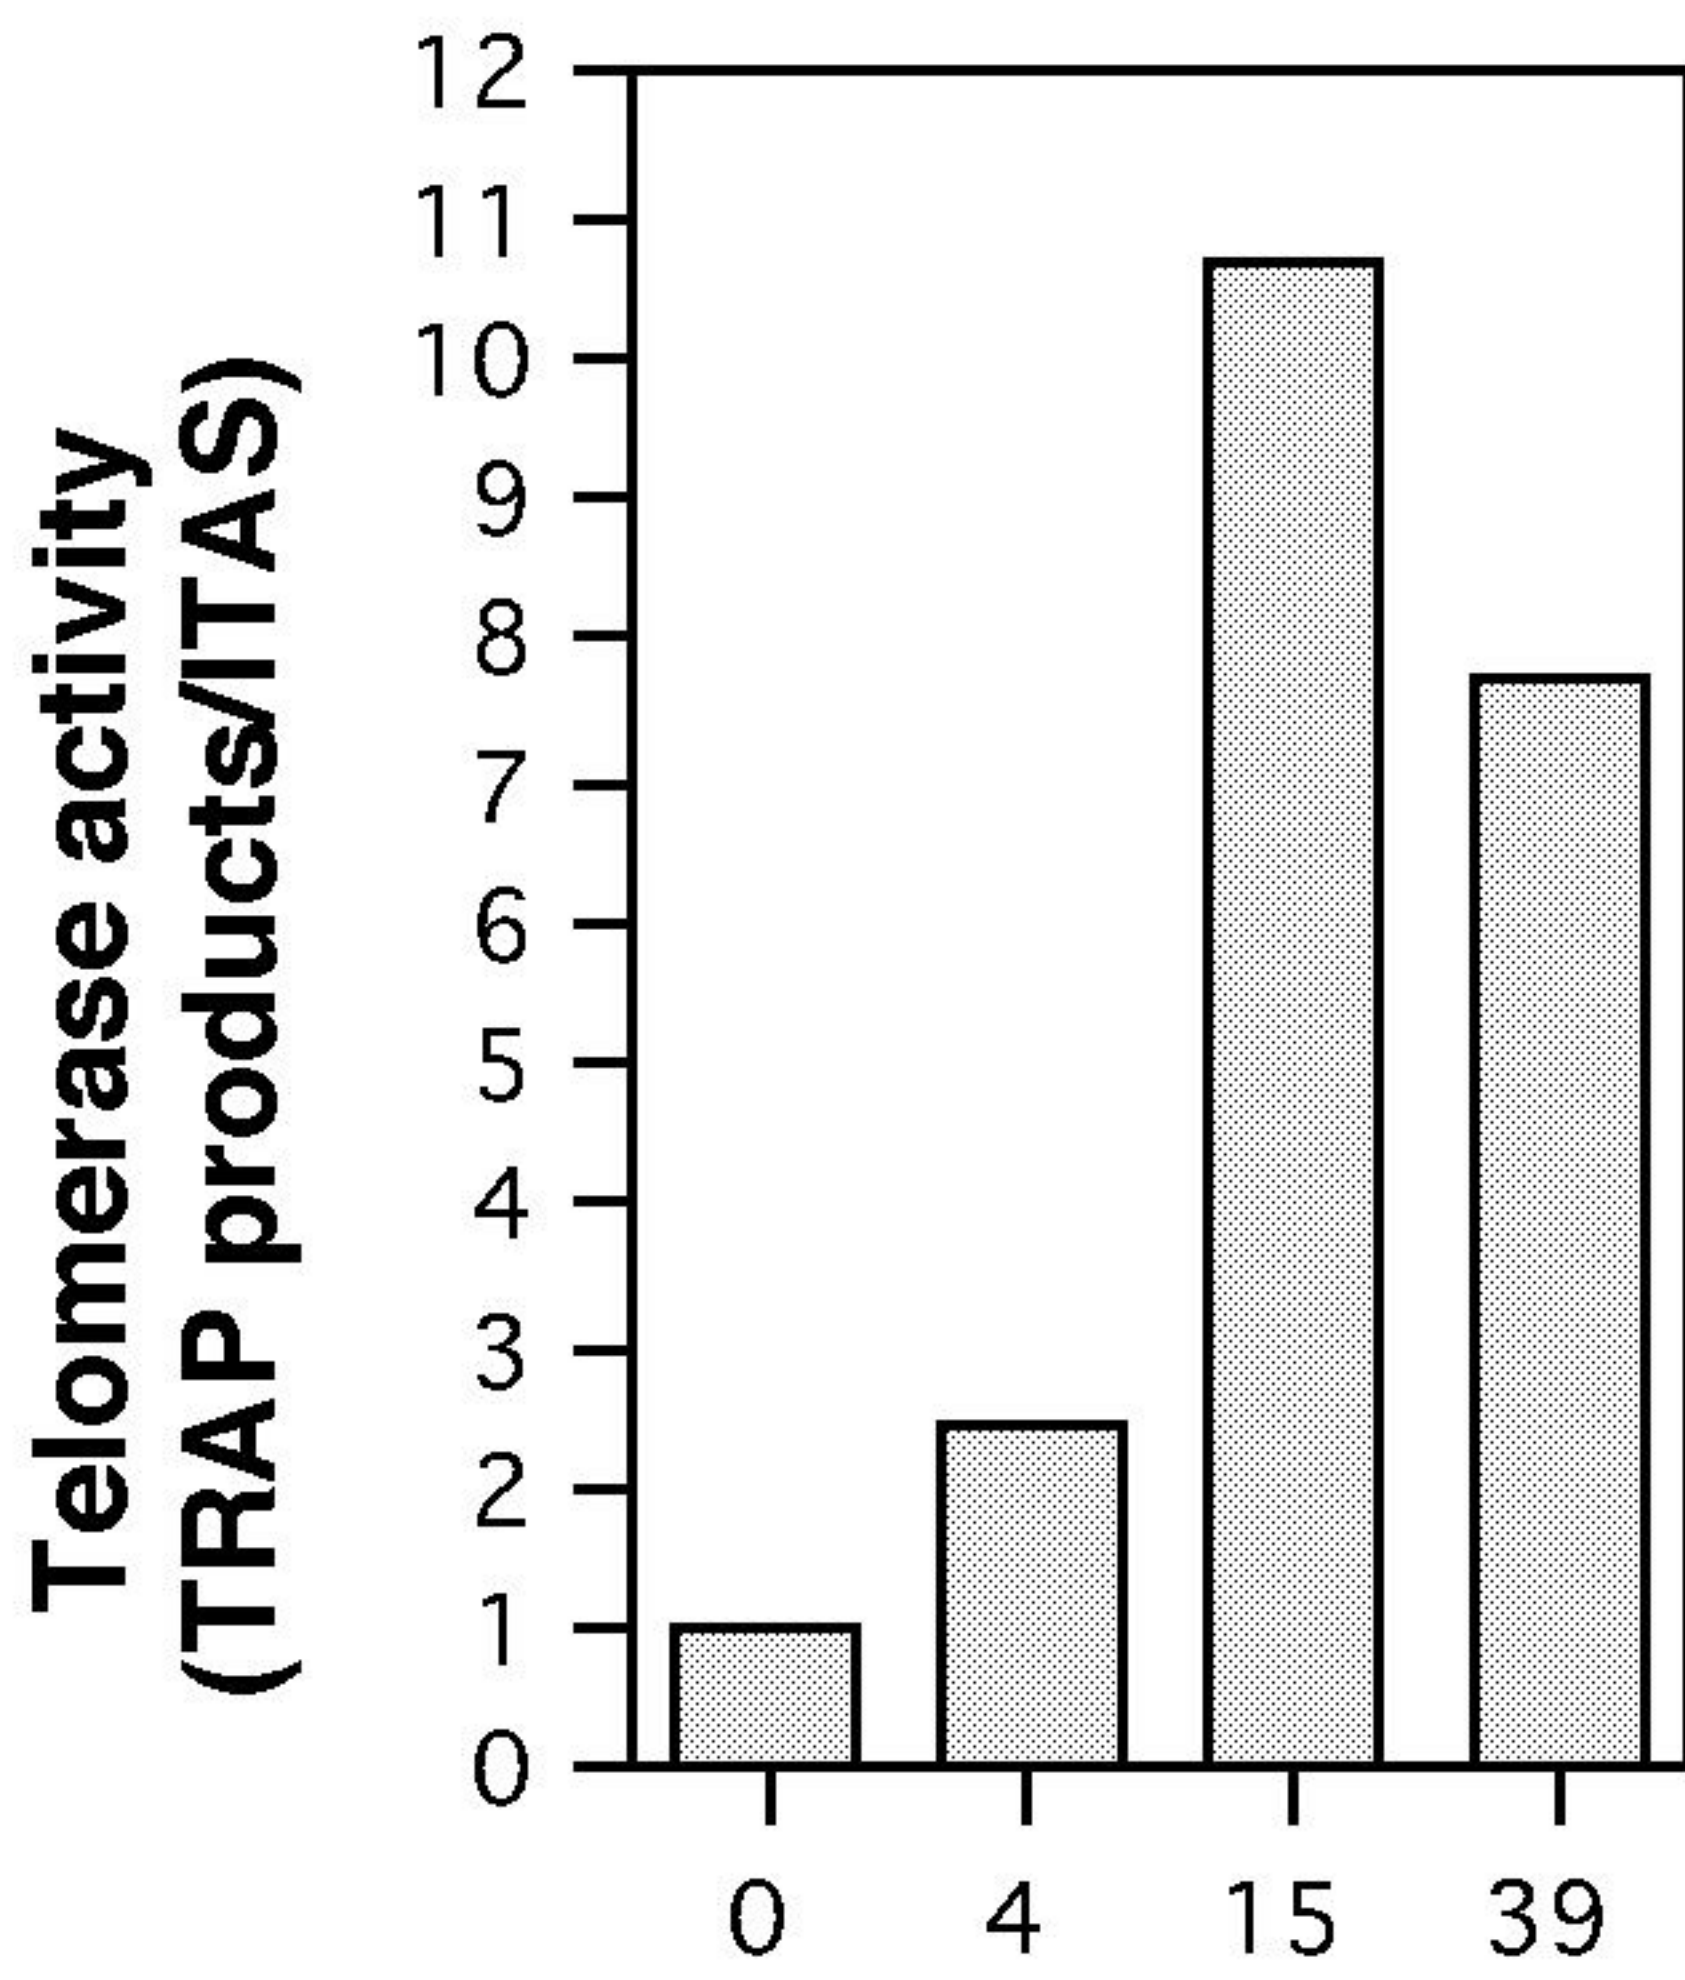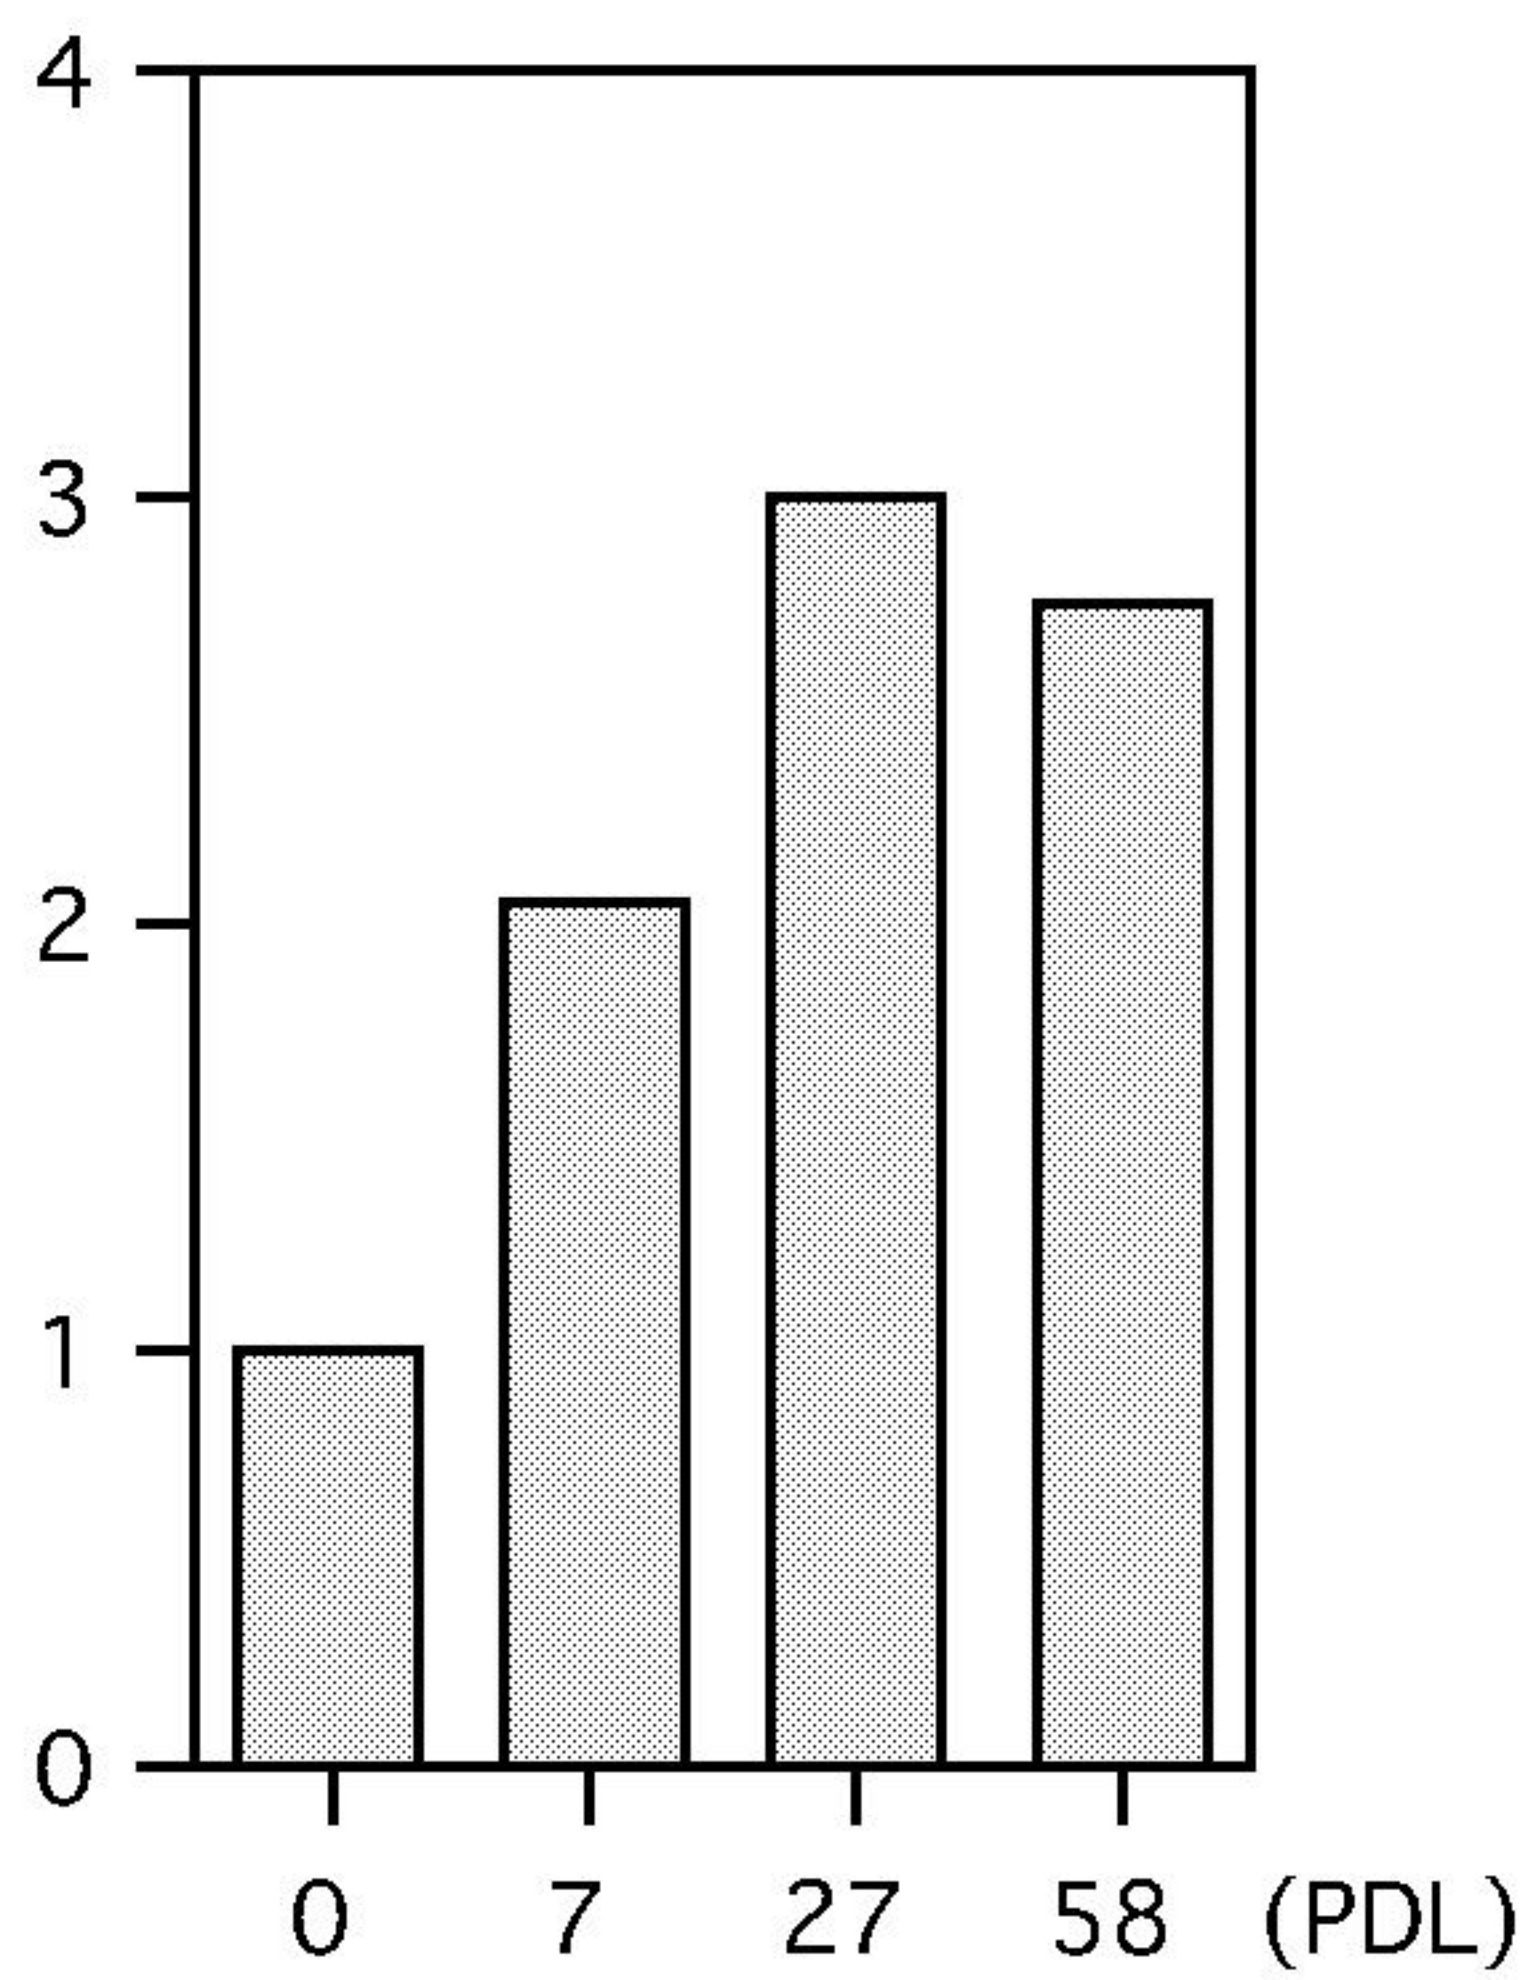

Supplement: MOESM6 [file 9460004]
